# Supplementary material for: Genetic Variants in MUC4 Gene Are Associated with Lung Cancer Risk in a Chinese Population
Source: PLoS One. 2013 Oct 21;8(10):e77723. doi: 10.1371/journal.pone.0077723 (PMC3804582; doi:10.1371/journal.pone.0077723)
Supplement: File S2 — Table A: Statistical powers in gene analysis; Table B: Statistical powers in gene and environment interaction analysis. (XLSX) [file pone.0077723.s007.xlsx]

## Sheet: Table A in File S2
File S2 Table A. Statistical power in gene alalysis
				MAF_case				Genetic Effect(RG)			Power
SNP_rs	Hypothesis	Outcome	Design	qA	Population Risk(KP)	Sample Size	a	Dominant (Odd Risk)	Log_addtive(Odd Risk)		Dominant	Log_addtive
rs863582	Gene Only	Disease	Case-Control (Matched)	0.3259	0.18	1048	0.05	1.25	1.3		0.7155	0.9801
rs842226	Gene Only	Disease	Case-Control (Matched)	0.3228	0.18	1048	0.05	1.38	1.28		0.9537	0.9647
rs842225	Gene Only	Disease	Case-Contro l(Matched)	0.3867	0.18	1048	0.05	1.1	1.21		0.1834	0.8224
rs2550236	Gene Only	Disease	Case-Control (Matched)	0.3327	0.18	1048	0.05	1.31	1.3		0.8617	0.9809
rs2688515	Gene Only	Disease	Case-Control (Matched)	0.3672	0.18	1048	0.05	1.26	1.29		0.7282	0.979
rs2641773	Gene Only	Disease	Case-Control (Matched)	0.3716	0.18	1048	0.05	1.24	1.27		0.6646	0.9638
rs3096337	Gene Only	Disease	Case-Control (Matched)	0.3087	0.18	1048	0.05	1.36	1.4		0.9375	0.9991
rs859769	Gene Only	Disease	Case-Control (Matched)	0.3459	0.18	1048	0.05	1.26	1.33		0.7381	0.9931
rs842461	Gene Only	Disease	Case-Control (Matched)	0.3097	0.18	1048	0.05	1.36	1.4		0.9373	0.9987

## Sheet: Table B in File S2
File S2 Table B. Statistical power in gene and environment interaction analysis
					MAF_case	Environ	Population Risk				Genetic Effect	Environmental Effect	Interaction	Power
SNP_rs	Hypothesis	Outcome	Design	Inheritance model	qA	PE	KP	Sample Size	a		`RG	`RE	`RGE	interaction
rs863582*Packs of year	Gene*Envir interaction	Disease	Case-Control (Matched)	Dominant	0.3259	0.3	0.18	1048	0.05		1.25	1.82	1.59	0.649
rs842461*Packs of year	Gene*Envir interaction	Disease	Case-Control (Matched)	Dominant	0.3097	0.3	0.18	1048	0.05		1.36	1.82	1.7	0.7918
